# Supplementary material
Source: ML conference proceedings conference paper supplement (https://proceedings.neurips.cc/paper_files/paper/2008/hash/185e65bc40581880c4f2c82958de8cfe-Abstract.html)
Supplement: Supplementary file 1 [file 185e65bc40581880c4f2c82958de8cfe-Supplemental.zip]

Archive with 1 entries (1 files):
- appendix.pdf
